# Supplementary material for: Hierarchical MnCo2O4 nanowire@NiFe layered double hydroxide nanosheet heterostructures on Ni foam for overall water splitting
Source: Royal Society of Chemistry journal article supplement (doi:10.1039/d1ce01037a), 2021-01-01
Supplement: d1ce01037a1.pdf [file d1ce01037a1.pdf]

## Supporting information

### **Hierarchical $\text{MnCo}_2\text{O}_4$ Nanowire@NiFe Layered Double Hydroxide Nanosheets Heterostructures on Ni foam for Overall Water Splitting**

Huafeng Shi, Kun Yang, Fangfang Wang, Yonghong Ni\* and Muheng Zhai

College of Chemistry and Materials Science, Key Laboratory of Functional Molecular Solids, Ministry of Education, Anhui Laboratory of Molecule-Based Materials, Anhui Key Laboratory of Functional Molecular Solids, Anhui Normal University, 189 Jiu Hua Southern Road, Wuhu, 241002, PR China

**Materials characterization:** Field emission scanning electron microscopy (FESEM, Hitachi S-4800) and transmission electron microscopy (TEM, Hitachi HT7700) were utilized to analyze the morphology and structure of the materials. The EDS elemental mapping images of the final product were obtained from Bruker Nano Analytics (GmbH Berlin, Germany) with the operated voltage of 200 kV. X-ray diffraction (XRD, Bruker D8 ADVANCE) was used to characterize the crystal structure. X-ray photoelectron spectroscopy (XPS) spectrum of catalysts was acquired by using a Thermo ESCALAB 250 instrument.

**Electrochemical measurement:** A CHI 660E electrochemical workstation was utilized for all electrochemical measurements. The carbon rod and Hg/HgO were used as the counter electrode and reference electrode, respectively. The MCO@NiFe-LDH/NF,  $\text{MnCo}_2\text{O}_4$ /NF or NiFe LDH/NF was separately used as the working electrode, employing 1 M KOH solution as the electrolyte. For OER performance measurement, all linear sweep voltammograms (LSV) were collected from 0.2

to 0.8 V (vs. saturated Hg/HgO) at a scan rate of 5 mV s<sup>-1</sup> with 90% IR compensation. The stability test was carried out through chronopotentiometry measurements without IR compensation at corresponding potentials to deliver current densities of 20, 50 and 100 mA cm<sup>-2</sup> for 20 h, respectively. The electrochemical impedance spectroscopy (EIS) measurements were recorded in the frequency range from 10<sup>-2</sup> Hz to 10<sup>5</sup> Hz with amplitude of 5 mV at the overpotential of 300 mV. The electrochemically active surface area (ECSA) was estimated from the electrochemical double-layer capacitance ( $C_{dl}$ ) obtained by cyclic voltammograms (CVs), which were measured in the potential range of 0.15-0.25 V (vs. saturated Hg/HgO) without faradic reaction at different scan rates (10, 20, 30, 40, 50 mV s<sup>-1</sup>). The Turnover frequency (TOF) values were calculated from the equation:  $TOF = (j \times A)/(4 \times n \times F)$ . Where,  $j$  is the current density at a certain overpotential,  $A$  is the surface area of the electrode,  $F$  is the Faraday constant (96485 C mol<sup>-1</sup>) and  $n$  is the molar number of active sites.

For HER performance measurement, the LSV curves were performed from -0.9 to -1.4 V (vs. saturated Hg/HgO) at a scan rate of 5 mV s<sup>-1</sup> with 90% IR compensation. The EIS spectra were obtained in the frequency range from 10<sup>-2</sup> to 10<sup>5</sup> Hz at the overpotential of -200 mV.

To investigate the overall water splitting performances of various electrodes (MCO@NiFe-LDH/NF, MnCo<sub>2</sub>O<sub>4</sub>/NF, NiFe LDH/NF and NF), the LSV curves were measured in 1 M KOH solution at a scan rate of 5 mV s<sup>-1</sup> from 1.0 to 2.0 V with 90% IR compensation. The long-term stability performance was performed at the current density of 50 mA cm<sup>-2</sup> for 200 h or 100 mA cm<sup>-2</sup> for 50 h.

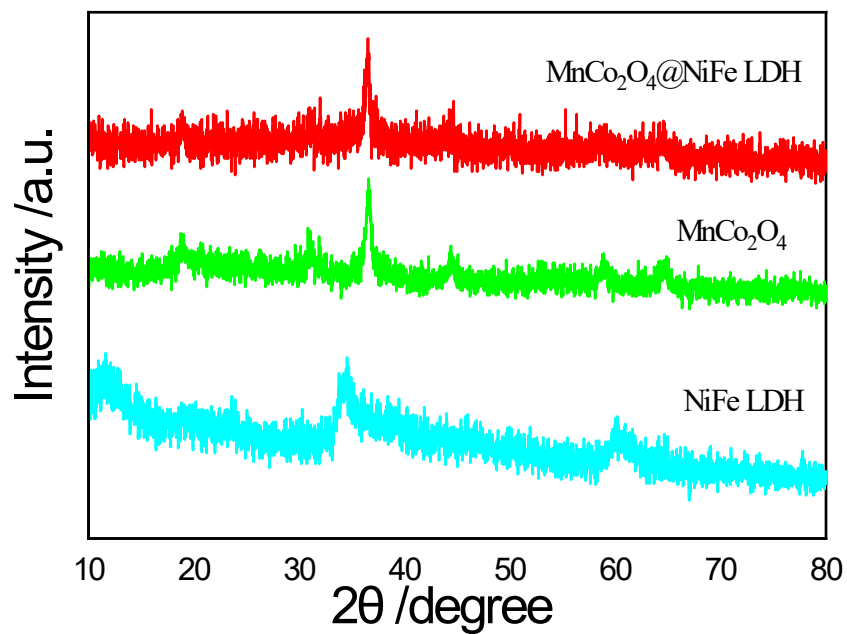

**Figure S1.** XRD patterns of as-obtained MnCo<sub>2</sub>O<sub>4</sub>, NiFe LDH and MCO@NiFe-LDH.

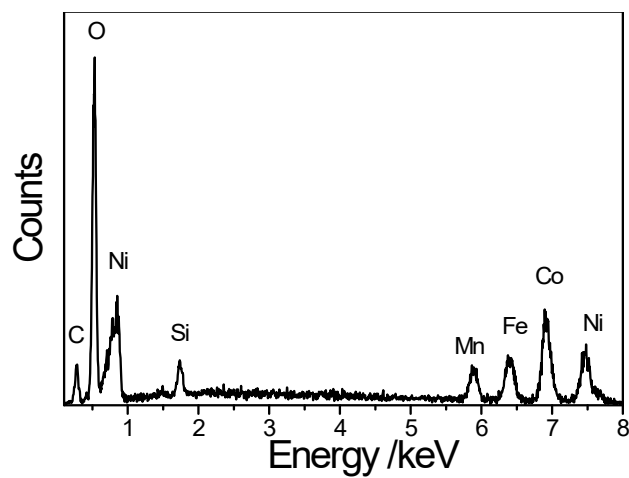

**Figure S2.** EDS analysis of as-prepared MCO@NiFe-LDH nanowires array.

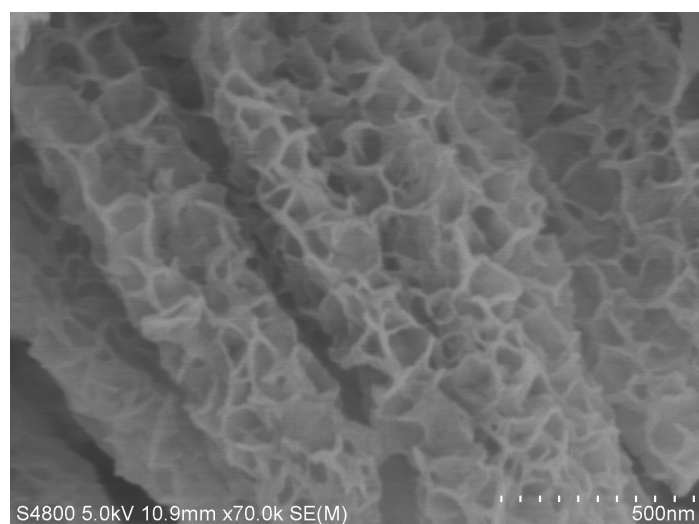

**Figure S3.** A representative FESEM image of MCO@NiFe-LDH catalyst after continuously catalyzing OER for 20 h at the current density of  $100 \text{ mA cm}^{-2}$ .

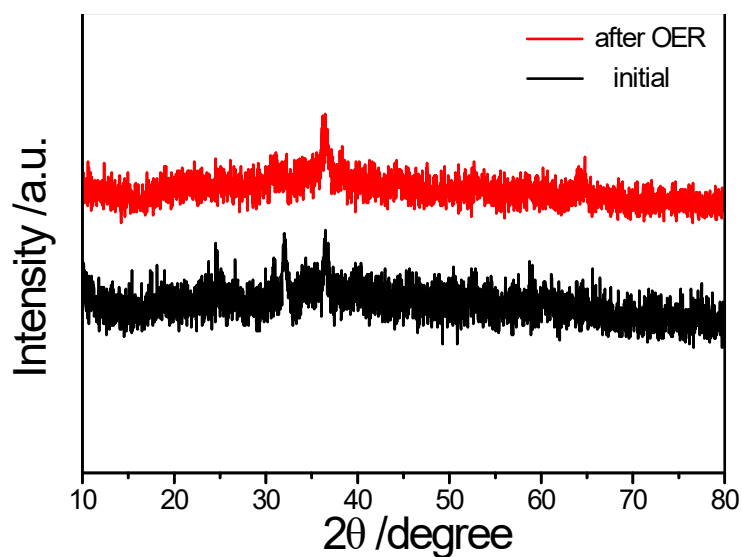

**Figure S4.** The XRD patterns of MCO@NiFe-LDH catalyst before and after continuously catalyzing for 20 h at the current density of  $100 \text{ mA cm}^{-2}$  for OER.

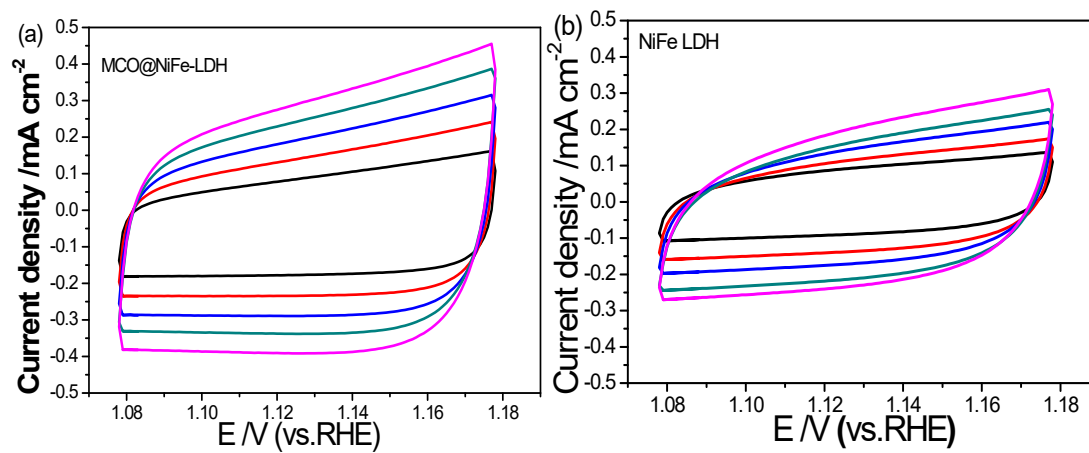

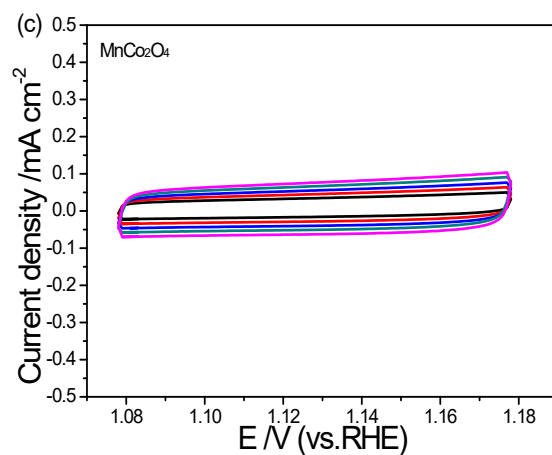

**Figure S5.** The cyclic voltammograms of various electrodes at different scan rates of 20, 30, 40, 50 and 60  $\text{mV s}^{-1}$ : (a) MCO@NiFe-LDH/NF, (b) NiFe LDH/NF and (c)  $\text{MnCo}_2\text{O}_4$ /NF.

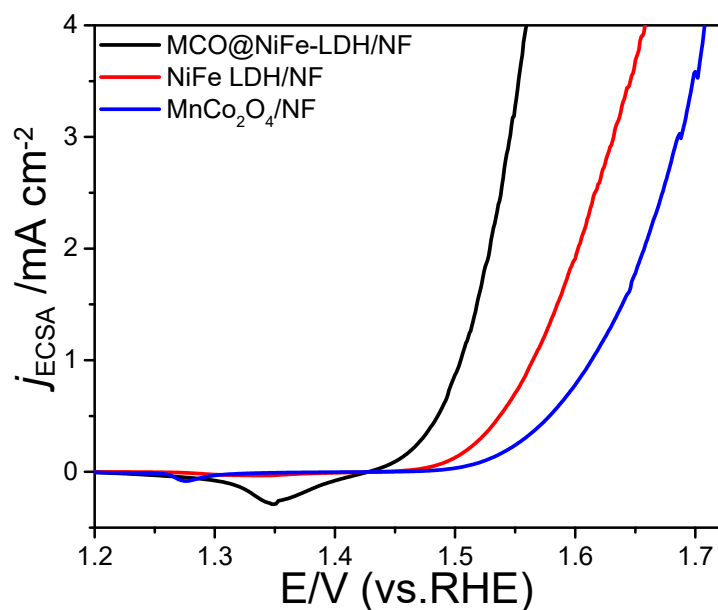

**Figure S6.** The ECSA-normalized LSV curves of various electrodes for OER.

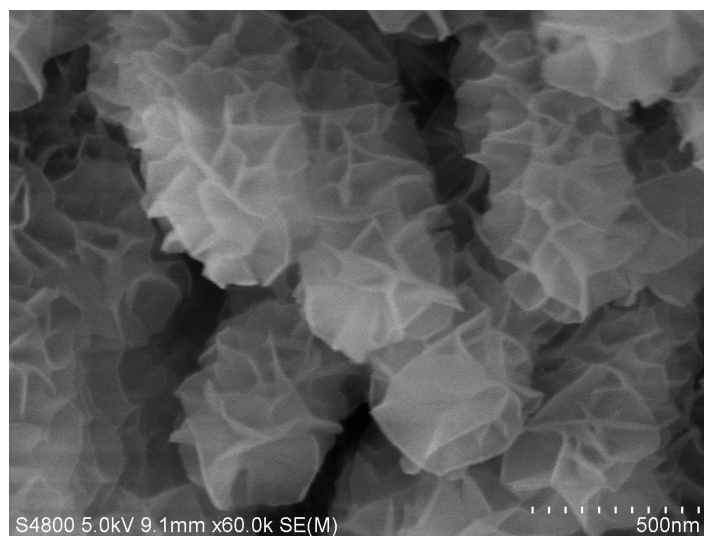

**Figure S7.** A typical FESEM image of MCO@NiFe-LDH catalyst after continuously catalyzing HER for 20 h at the current density of  $100 \text{ mA cm}^{-2}$ .

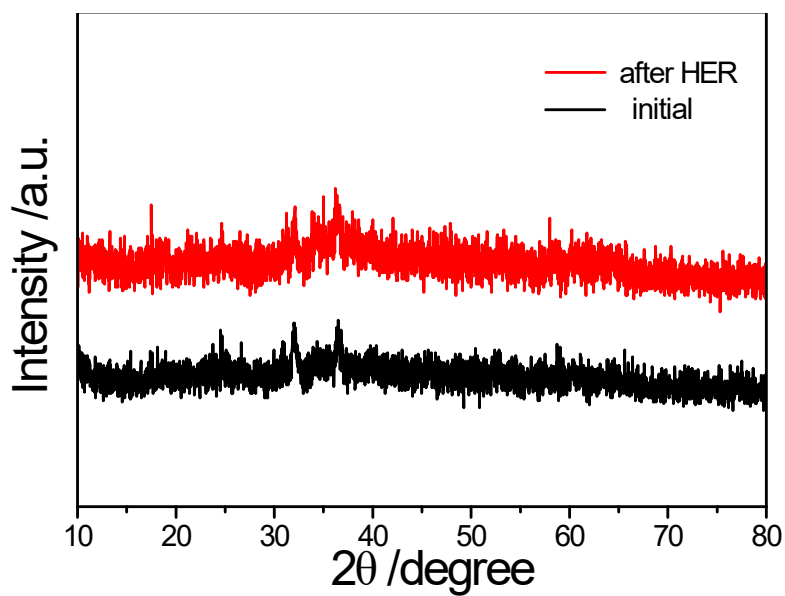

**Figure S8.** The XRD patterns of MCO@NiFe-LDH catalyst before and after continuously catalyzing for 20 h at the current density of  $100 \text{ mA cm}^{-2}$  for HER.

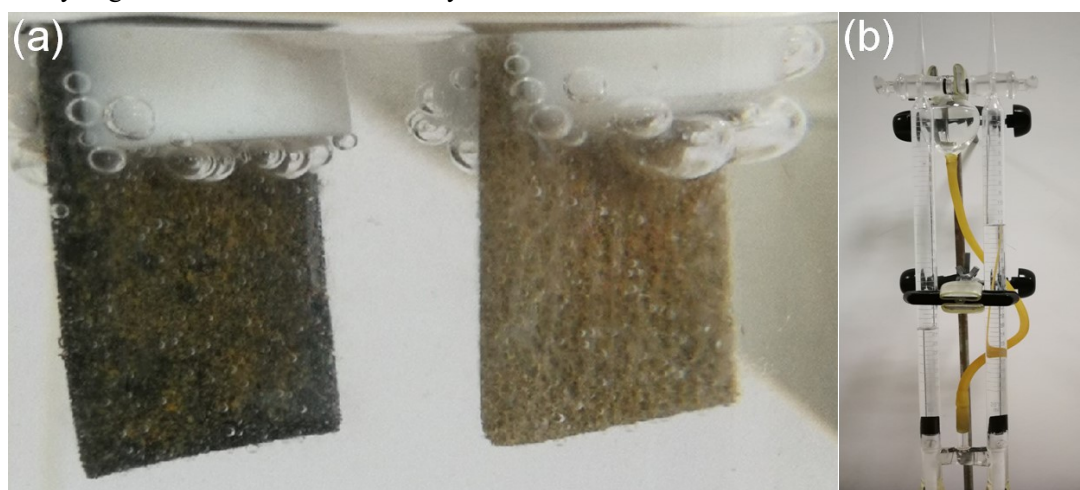

**Figure S9.** (a) Digital photograph for overall water splitting using the MCO@NiFe-LDH/NF electrode as both anode and cathode; and (b) the Hoffman device.

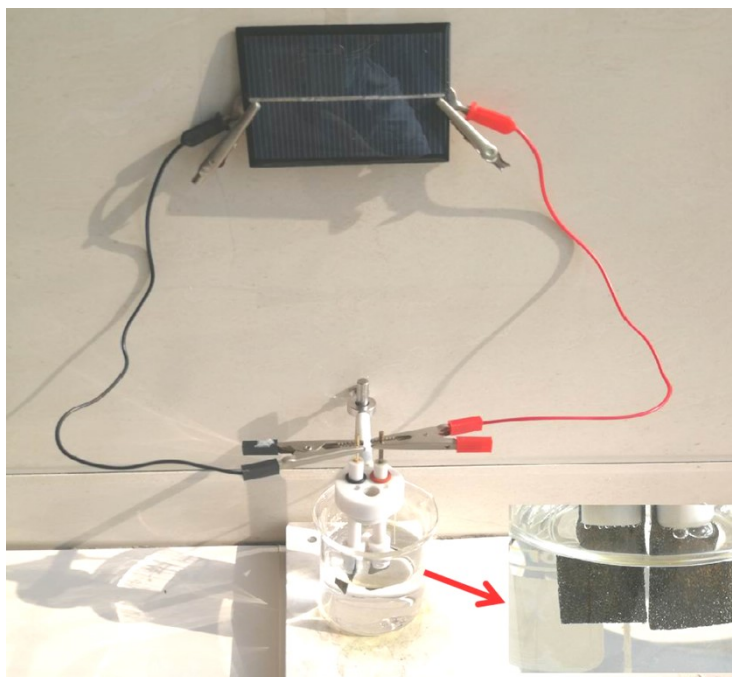

**Figure S10.** A photograph of the overall water splitting driven by a commercial polycrystalline silicon solar cell of 1.5 V under Sunlight irradiation.

**Table S1.** The comparison of OER catalytic performance of MnCo<sub>2</sub>O<sub>4</sub>@NiFe LDH with some OER catalysts reported in the literature.

| Catalyst                                         | Electrolyte | $\eta$ (mV) at 10 mA cm <sup>-2</sup> | Ref.      |
|--------------------------------------------------|-------------|---------------------------------------|-----------|
| MnCo <sub>2</sub> O <sub>4</sub> @NiFe LDH/NF    | 1M KOH      | 215                                   | This work |
| NiFe LDH/NF                                      | 1M KOH      | 271                                   | This work |
| MnCo <sub>2</sub> O <sub>4</sub> /NF             | 1M KOH      | 301                                   | This work |
| NiCo <sub>2</sub> S <sub>4</sub> /NF             | 1M KOH      | 260                                   | 1         |
| Co(OH) <sub>2</sub>                              | 1M KOH      | 360                                   | 2         |
| NiO/NiFe <sub>2</sub> O <sub>4</sub>             | 1M KOH      | 302                                   | 3         |
| NiO-NiFe <sub>2</sub> O <sub>4</sub> /rGO        | 1M KOH      | 296                                   | 4         |
| Ni(OH) <sub>2</sub>                              | 1M KOH      | 595                                   | 5         |
| Co <sub>3</sub> S <sub>4</sub>                   | 1M KOH      | 355                                   | 6         |
| Ni <sub>3</sub> S <sub>2</sub> /MnO <sub>2</sub> | 1M KOH      | 260                                   | 7         |
| CuOx@CoO                                         | 1M KOH      | 254                                   | 8         |
| Mn-CoN                                           | 1M KOH      | 265                                   | 9         |
| Co-Se-S-O/CC                                     | 1M KOH      | 480                                   | 10        |

**Table S2.** The solution resistance ( $R_s$ ), charge transfer resistance ( $R_{ct}$ ) and mass transfer resistance ( $R_f$ ) of various working electrodes.

| Electrode                            | $R_s$ / $\Omega$ | $R_{ct}$ / $\Omega$ | $R_f$ / $\Omega$ |
|--------------------------------------|------------------|---------------------|------------------|
| MCO@NiFe-LDH/NF                      | 1.02             | 2.95                | 6.53             |
| NiFe LDH/NF                          | 1.44             | 21.48               | 19.64            |
| MnCo <sub>2</sub> O <sub>4</sub> /NF | 1.48             | 31.53               | 14.24            |



**Table S3.** The comparison of HER catalytic performance of MnCo<sub>2</sub>O<sub>4</sub>@NiFe LDH with some HER catalysts reported in the literature.

| Catalyst                                             | Electrolyte | $\eta$ (mV) at 10 mA cm <sup>-2</sup> | Ref.      |
|------------------------------------------------------|-------------|---------------------------------------|-----------|
| MnCo <sub>2</sub> O <sub>4</sub> @NiFe LDH/NF        | 1M KOH      | 129                                   | This work |
| MnCo <sub>2</sub> O <sub>4</sub> /NF                 | 1M KOH      | 220                                   | This work |
| NiFe LDH/NF                                          | 1M KOH      | 193                                   | This work |
| Ni <sub>3</sub> S <sub>2</sub> /NF                   | 1M KOH      | 223                                   | 11        |
| NiCoS                                                | 1M KOH      | 228                                   | 12        |
| NiCoP                                                | 1M KOH      | 197                                   | 13        |
| FeP                                                  | 1M KOH      | 370                                   | 14        |
| MoSe <sub>2</sub> /CoSe <sub>2</sub>                 | 1M KOH      | 148                                   | 15        |
| Ni <sub>3</sub> S <sub>2</sub> /MnO <sub>2</sub> /NF | 1 M KOH     | 102                                   | 16        |
| CoP/NPC/TF                                           | 1 M KOH     | 91                                    | 17        |
| Mn-Co-P/Ti                                           | 1 M KOH     | 76                                    | 18        |
| Mn-CoP                                               | 1 M KOH     | 81                                    | 19        |
| Co <sub>9</sub> S <sub>8</sub> /NC@MoS <sub>2</sub>  | 1 M KOH     | 67                                    | 20        |

**Table S4.** The comparison of overall water splitting catalytic performance of MnCo<sub>2</sub>O<sub>4</sub>@NiFe LDH with some bifunctional catalysts reported in the literature.

| Catalyst                                                | Electrolyte | Full water splitting                          |                                     | Ref.      |
|---------------------------------------------------------|-------------|-----------------------------------------------|-------------------------------------|-----------|
|                                                         |             | Cell voltage (V) at<br>10 mA cm <sup>-2</sup> | η (mV) at 10 mA<br>cm <sup>-2</sup> |           |
| MnCo <sub>2</sub> O <sub>4</sub> @NiFe<br>LDH/NF        | 1M KOH      | 1.55                                          | 330                                 | This work |
| MnCo <sub>2</sub> O <sub>4</sub> /NF                    | 1M KOH      | 1.73                                          | 500                                 | This work |
| NiFe LDH/NF                                             | 1M KOH      | 1.64                                          | 410                                 | This work |
| α-NiOOH/NF                                              | 1M KOH      | 1.66                                          | 430                                 | 21        |
| VOOH                                                    | 1M KOH      | 1.62                                          | 390                                 | 22        |
| Co <sub>9</sub> S <sub>8</sub>                          | 1M KOH      | 1.60                                          | 370                                 | 23        |
| N doped Ni <sub>3</sub> S <sub>2</sub> /VS <sub>2</sub> | 1M KOH      | 1.65                                          | 418                                 | 24        |
| Ni <sub>2</sub> P/rGo                                   | 1M KOH      | 1.61                                          | 380                                 | 25        |
| MoS <sub>2</sub> /Ni <sub>3</sub> S <sub>2</sub>        | 1M KOH      | 1.56                                          | 330                                 | 26        |
| NiFeRu-LDH                                              | 1M KOH      | 1.52                                          | 290                                 | 27        |
| NiFeMo                                                  | 1M KOH      | 1.45                                          | 220                                 | 28        |
| Cu@NiFe -LDH                                            | 1M KOH      | 1.53                                          | 300                                 | 29        |
| Fe-NiO                                                  | 1M KOH      | 1.58                                          | 350                                 | 30        |

## References

- 1 A. Sivanantham, P. Ganesan, S. Shanmugam, *Adv. Funct. Mater.* 2016, 26, 4661-4672.
- 2 L. Huang, J. Jiang, L. Ai, *ACS Appl. Mater. Interfaces.* 2017, 9, 7059-7067.
- 3 G. Liu, X. Gao, K. Wang, D. He, J. Li, *Int. J. Hydrogen. Energy.* 2016, 41, 17976-17986.
- 4 G. Zhang, Y. Li, Y. Zhou, F. Yang, *Chem. Electro. Chem.* 2016, 3, 1927-1936.
- 5 X. M. Zhou, Z. M. Xia, Z. Y. Zhang, Y. Y. Ma, Y. Q. Qu, *J. Mater. Chem. A.* 2014, 2, 11799-11806.
- 6 Y. W. Liu, C. Xiao, M. J. Lyu, Y. Lin, W. Z. Cai, P. C. Huang, W. Tong, Y. M. Zou, Y. Xie, *Angew. Chem., Int. Ed.* 2015, 54, 11231-11235.
- 7 Y. Xiong, L. Xu, C. Jin, Q. Sun. *J. Alloy Compd.* 2020, 745, 468-478
- 8 P. Li, J. Wang, N. Cai, L. Wang, J. Tong, F. Yu, *ChemCatChem.* 2020, 12, 1639 – 1646
- 9 Y. Sun, T. Zhang, X. Li, D. Liu, G. Liu, X. Zhang, X. Lyu, W. Cai, Y. Li, *Chem. Commun.*, 2017, 53, 13237--13240.
- 10 Z. M. Luo, J. W. Wang, J. B. Tan, Z. M. Zhang, T. B. Lu. *ACS Appl. Mater. Interfaces* 2018, 10, 8231–8237
- 11 L. L. Feng, G. T. Yu, Y. Y. Wu, G. D. Li, H. Li, Y. H. Sun, T. Asefa, W. Chen, X. X. Zou, *J. Am. Chem. Soc.* 2015, 137, 14023-14026.
- 12 D. X. Zhang, W. D. He, Z. Zhang, X. J. Xu, *J. Alloy Compd.* 2019, 785, 468-474.
- 13 J. Z. Li, G. D. Wei, Y. K. Zhu, Y. L. Xi, X. X. Pan, Y. Ji, Igor. V. Zatonvsky, W. Han, *J. Mater. Chem. A.* 2017, 5, 14828-14837.
- 14 Y. H. Liang, Q. Liu, Abdullah M. Asiri, X. P. Sun, Y. L. Luo, *ACS Catal.* 2014, 4, 4065-4069.
- 15 X. Q. Wang, B. J. Zheng, B. Yu, B. Wang, W. Q. Hou, W. L. Zhang, Y. F. Chen, *J. Mater. Chem. A* 2018, 6, 7842-7850.
- 16 Y. Xiong, L. L. Xu, C. D. Jin, Q. F. Sun, *Appl. Catal. B* 2019, 254, 329-338.
- 17 X. Huang, X. Xu, C. Li, D. Wu, D. Cheng, D. Cao. *Adv. Energy Mater.* 2019, 1803970
- 18 Q. Zhang, C. C. Zhang, J. B. Liang, P. G. Yin, Y. Tian, *ACS Sustain. Chem. Eng.* 2017, 5, 3808-3818.
- 19 T. Liu, X. Ma, D. Liu, S. Hao, G. Du, Y. Ma, A. M. Asiri, X. Sun, L. Chen. *ACS Catal.* 2017, 7, 98–102.
- 20 D. Zhao, K. Wu, Z. Liu, Y. Liu, D. Wang, Q. Peng, C. Chen, Y. Li, *Nano Energy* 2019, 56,

- 411-419.
- 21 H. H. Shi, H. F. Liang, F. W. Ming, Z. C. Wang, *Angew. Chem. Int. Ed.* 2017, 56, 573-577.
- 22 Y. T. Zhang, S. J. Chao, X. B. Wang, H. J. Han, Z. Y. Bai, L. Yang, *Electrochim. Acta.* 2017, 246, 380-390.
- 23 X.W. Zhong, J. Tang, J. W. Wang, M. M. Shao, J. W. Chai, S. P. Wang, M. Yang, Y. Yang, N. Wang, S. J. Wang, B. M. Xu, H. Pan, *Electrochim. Acta.* 2018, 269, 55-61.
- 24 L. T. Yan, H. M. Jiang, Y. L. Xing, Y. Wang, D. D. Liu, X. B. Zhao, *J. Mater. Chem. A.* 2018, 6, 1682-1691.
- 25 J. Zhang, T. Wang, D. Pohl, B. Rellinghaus, R.H. Dong, S. H. Liu, X. D. Zhuang, X. L. Feng, *Angew. Chem. Int. Ed.* 2016, 55, 6702-6707.
- 26 G. B. Chen, T. Wang, J. Zhang, P. Liu, H. J. Sun, X. D. Zhuang, M. W. Chen, X. L. Feng, *Adv. Mater.* 2018, 30, 1706279.
- 27 F. Qin, Z. H. Zhao, M. K. Alam, Y. Z. Ni, F. Robles-Hernandez, L. Yu, S. Chen, Z. F. Ren, Z. M. Wang, J. M. Bao, *ACS Energy Lett.* 2018, 3, 546-554.
- 28 C. Xiao, Y. Li, X. Lu, C. Zhao, *Adv. Funct. Mater.* 2016, 26, 3515 – 3523
- 29 L. Yu, H. Zhou, J. Sun, F. Qin, F. Yu, J. Bao, Y. Yu, S. Chen, Z. Ren, *Energy Environ. Sci.*, 2017, 10, 1820
- 30 Z. Wu, Z. Zou, J. Huang, F. Gao, *J. Catal.* 2018, 358, 243-252.
